# Supplementary material for: A genetic contribution from the Far East into Ashkenazi Jews via the ancient Silk Road
Source: PubMed Central journal article supplement (PMC4323646; doi:10.1038/srep08377), 2015-02-11
Supplement: srep08377-s1.pdf [file srep08377-s1.pdf]

## **Supplementary Information**

### **A genetic contribution from the Far East into Ashkenazi Jews via the ancient Silk Road**

Jiao-Yang Tian, Hua-Wei Wang, Yu-Chun Li, Wen Zhang, Yong-Gang Yao, Jits van Straten,

Martin B. Richards and Qing-Peng Kong\*

\* Correspondence author: Dr. Qing-Peng Kong

State Key Laboratory of Genetic Resources and Evolution, Kunming Institute of Zoology, Chinese

Academy of Sciences, Kunming 650223, China.

Tel/Fax: +86-871-65197967; Email: [kongqp@mail.kiz.ac.cn](mailto:kongqp@mail.kiz.ac.cn)

Supplementary Table S1 Sample information of populations analyzed in present study (A total of 853 populations, 55,595 individuals)

| <b>Population, Region/Country</b>    | <b>Sample Size</b> | <b>References</b> |
|--------------------------------------|--------------------|-------------------|
| <i>Jew</i>                           |                    |                   |
| Ethiopian Jewish, Ethiopia           | 41                 | 1                 |
| Yemenite Jewish, Yemen               | 45                 | 1                 |
| Ashkenazi, Austria/Hungary           | 29                 | 2                 |
| Ashkenazi, Byelorussia               | 10                 | 2                 |
| Ashkenazi, Czech Republic            | 15                 | 2                 |
| Ashkenazi, Estonia                   | 1                  | 2                 |
| Ashkenazi, France                    | 49                 | 2                 |
| Ashkenazi, Germany                   | 32                 | 2                 |
| Ashkenazi, Latvia                    | 8                  | 2                 |
| Ashkenazi, Lithuania                 | 30                 | 2                 |
| Ashkenazi, Moldavia                  | 1                  | 2                 |
| Ashkenazi, Netherlands               | 21                 | 2                 |
| Ashkenazi, Poland                    | 170                | 2                 |
| Ashkenazi, Romania                   | 97                 | 2                 |
| Ashkenazi, Russia                    | 63                 | 2                 |
| Ashkenazi, Switzerland               | 3                  | 2                 |
| Ashkenazi, Ukraine                   | 54                 | 2                 |
| Azerbaijan Mountain Jews, Azerbaijan | 58                 | 3                 |
| Belmonte Jews, Belmonte              | 30                 | 3                 |
| Spanish Exilers, Bulgaria            | 71                 | 3                 |
| Cochin Jews, India                   | 45                 | 3                 |
| Ethiopia Jews, Ethiopia              | 29                 | 3                 |
| Mountain Jews, Georgia               | 74                 | 3                 |
| Bnei Israel, India                   | 34                 | 3                 |
| Near East Jews, Iran                 | 82                 | 3                 |
| Near East Jews, Iraq                 | 135                | 3                 |
| North Africa Jews, Libya             | 83                 | 3                 |
| North Africa Jews, Morocco           | 149                | 3                 |
| North Africa Jews, Tunisia           | 37                 | 3                 |
| Spanish Exilers, Turkey              | 123                | 3                 |
| Yemen Jews, Yemen                    | 119                | 3                 |
| Spanish Exilers, Former Yugoslavia   | 1                  | 3                 |
| Spanish Exilers, Greece              | 3                  | 3                 |
| Spanish Exilers, Italy               | 9                  | 3                 |
| Spanish Exilers, Netherlands         | 1                  | 3                 |
| Spanish Exilers, Rodus               | 1                  | 3                 |
| Spanish Exilers, Spain               | 3                  | 3                 |
| Spanish Exilers, Surinam             | 1                  | 3                 |
| Ashkenazi Jews, Hungary              | 173                | 4                 |

---

*East Asia*

|                                    |     |    |
|------------------------------------|-----|----|
| Manchurian, China                  | 40  | 5  |
| Korean-Chinese, South Korea        | 51  | 5  |
| Korean, South Korea                | 185 | 5  |
| Chinese Han, Beijing, China        | 40  | 5  |
| Hong Kong people, Hong Kong, China | 377 | 6  |
| Ancient workers, China             | 19  | 7  |
| Japanese, Japan                    | 4   | 8  |
| Chinese, China                     | 5   | 8  |
| Tibetan, China                     | 168 | 9  |
| Tibetan, China                     | 220 | 9  |
| Tibetan, China                     | 71  | 9  |
| Tibetan, China                     | 62  | 9  |
| Tibetan, China                     | 61  | 10 |
| Tibetan, China                     | 55  | 10 |
| Tibetan, China                     | 59  | 10 |
| Tibetan, China                     | 58  | 10 |
| Tibetan, China                     | 46  | 10 |
| Monba, China                       | 51  | 10 |
| Tibetan, China                     | 53  | 10 |
| Lhoba, China                       | 20  | 10 |
| Tibetan, China                     | 56  | 10 |
| Tibetan, China                     | 59  | 10 |
| Tibetan, China                     | 44  | 10 |
| Tibetan, China                     | 40  | 11 |
| Bai, China                         | 40  | 12 |
| Hani, China                        | 33  | 12 |
| Lahu, China                        | 15  | 12 |
| Naxi, China                        | 45  | 12 |
| Pumi, China                        | 35  | 12 |
| Tibetan, China                     | 35  | 12 |
| Yi, China                          | 56  | 12 |
| Lahu, China                        | 35  | 13 |
| Lahu, China                        | 32  | 14 |
| Tibetan, China                     | 24  | 14 |
| Va, China                          | 36  | 13 |
| Va, China                          | 22  | 14 |
| Hui, China                         | 45  | 15 |
| Kazak, China                       | 53  | 15 |
| Mongoloid, China                   | 49  | 15 |
| Uygur, China                       | 47  | 15 |
| Uzbek, China                       | 58  | 15 |
| Bonan, China                       | 95  | 16 |
| Dongxiang, China                   | 96  | 17 |

---

---

|                                      |     |    |
|--------------------------------------|-----|----|
| Salar, China                         | 99  | 18 |
| Salar, China                         | 10  | 19 |
| Yugur, China                         | 100 | 20 |
| Dongxiang, China                     | 10  | 19 |
| Xiaohe cemetery, China               | 20  | 21 |
| Xiaohe cemetery , China              | 17  | 22 |
| Daheyang, Xinjiang, China            | 58  | 23 |
| Niya Site, Xinjiang, China           | 14  | 24 |
| Yuansha Ruins, Xinjiang, China       | 15  | 24 |
| Zagunluke Cemetery, Xinjiang, China  | 13  | 24 |
| Ancient samples from Xinjiang, China | 11  | 25 |
| Taiyuan, Shanxi, China               | 2   | 22 |
| Daur, China                          | 45  | 26 |
| Ewenki, China                        | 47  | 26 |
| Kor, China                           | 48  | 26 |
| Mongoloid, China                     | 48  | 26 |
| Oro, China                           | 44  | 26 |
| Kor-S, China                         | 55  | 27 |
| H-Anhui, China                       | 42  | 28 |
| H-Fujian, China                      | 51  | 28 |
| H-Gansu, China                       | 45  | 28 |
| H-Guangxi, China                     | 26  | 28 |
| H-Hunan, China                       | 16  | 28 |
| H-Jiangsu, China                     | 67  | 28 |
| H-Jiangxi, China                     | 23  | 28 |
| H-Liaoning, China                    | 51  | 28 |
| H-Neimeng, China                     | 45  | 28 |
| H-Qinhai, China                      | 44  | 28 |
| H-Shanghai, China                    | 56  | 28 |
| H-Shannxi, China                     | 53  | 28 |
| H-Sichuan, China                     | 70  | 28 |
| H-Yunnan, China                      | 58  | 28 |
| H-Zhejiang, China                    | 61  | 28 |
| H-GD, China                          | 30  | 29 |
| H-LN, China                          | 51  | 29 |
| H-QD, China                          | 50  | 29 |
| H-WH, China                          | 42  | 29 |
| H-XJ, China                          | 47  | 29 |
| H-YN, China                          | 43  | 29 |
| H-SD, China                          | 76  | 30 |
| Han, Yan Bian, Jilin, China          | 51  | 27 |
| Ab-Taiwanese, China                  | 180 | 31 |
| TW-Han, China                        | 155 | 32 |
| H-GD, China                          | 69  | 33 |

---

---

|                  |     |                      |
|------------------|-----|----------------------|
| C-SH, China      | 120 | 34                   |
| H-CS, China      | 82  | 35                   |
| H-Xi'an, China   | 85  | 35                   |
| Aini, China      | 47  | 12                   |
| BAI, China       | 19  | 12                   |
| Jino, China      | 18  | 12                   |
| QH-Tib, China    | 56  | 12                   |
| Tujia, China     | 66  | 12                   |
| Tujia, China     | 31  | 12                   |
| YN-Dai, China    | 21  | 14                   |
| YN-Dai, China    | 38  | 11                   |
| MHN, China       | 103 | 36                   |
| MYN, China       | 39  | 36                   |
| YBN, China       | 19  | 36                   |
| YBP, China       | 35  | 36                   |
| YDB, China       | 10  | 36                   |
| YGS, China       | 24  | 36                   |
| YHT, China       | 19  | 36                   |
| YKM, China       | 40  | 36                   |
| YLO, China       | 42  | 36                   |
| YLT, China       | 26  | 36                   |
| YMB, China       | 6   | 36                   |
| YMI, China       | 32  | 36                   |
| YPA, China       | 32  | 36                   |
| YTU, China       | 41  | 36                   |
| YWU, China       | 31  | 36                   |
| YXB, China       | 11  | 36                   |
| YYM, China       | 27  | 36                   |
| Q_Tib, China     | 76  | 9                    |
| G_Tib, China     | 83  | 9                    |
| XZ-Lhoba, China  | 50  | Our unpublished data |
| XZ-Monba, China  | 31  | Our unpublished data |
| wanyan, China    | 46  | Our unpublished data |
| Japanese, Japan  | 50  | 37                   |
| Japanese, Japan  | 162 | 38                   |
| Japanese, Japan  | 211 | 39                   |
| Gifu, Japan      | 137 | 40                   |
| Japanese, Japan  | 150 | 34                   |
| Japanese, Japan  | 100 | 41                   |
| Japanese, Japan  | 124 | 42                   |
| Japanese, Japan  | 62  | 43                   |
| Ainu, Japan      | 50  | 43                   |
| Pyukyuan, Japan  | 50  | 43                   |
| Achang-YN, China | 60  | Our unpublished data |

---

---

|                     |     |                      |
|---------------------|-----|----------------------|
| Bai-YN, China       | 21  | Our unpublished data |
| Bai-YN, China       | 19  | Our unpublished data |
| Blang-YN, China     | 90  | Our unpublished data |
| Dai-YN, China       | 46  | Our unpublished data |
| Dai-YN, China       | 24  | Our unpublished data |
| Dai-YN, China       | 30  | Our unpublished data |
| Dai-YN, China       | 27  | Our unpublished data |
| Deang-YN, China     | 52  | Our unpublished data |
| Drung -YN, China    | 35  | Our unpublished data |
| Hani-YN, China      | 9   | Our unpublished data |
| Hani-YN, China      | 39  | Our unpublished data |
| Hani-YN, China      | 18  | Our unpublished data |
| Jingpo-YN, China    | 60  | Our unpublished data |
| Jino-YN, China      | 51  | Our unpublished data |
| Lahu-YN, China      | 26  | Our unpublished data |
| Lahu-YN, China      | 36  | Our unpublished data |
| Lisu-YN, China      | 31  | Our unpublished data |
| Lisu-YN, China      | 20  | Our unpublished data |
| Lisu-YN, China      | 18  | Our unpublished data |
| Naxi-YN, China      | 62  | Our unpublished data |
| Naxi-YN, China      | 6   | Our unpublished data |
| Nu-YN, China        | 40  | Our unpublished data |
| Pumi-YN, China      | 19  | Our unpublished data |
| Pumi-YN, China      | 25  | Our unpublished data |
| Tibetan-YN, China   | 11  | Our unpublished data |
| Tibetan-YN, China   | 54  | Our unpublished data |
| Wa-YN, China        | 14  | Our unpublished data |
| Yao-YN, China       | 8   | Our unpublished data |
| Yi-YN, China        | 28  | Our unpublished data |
| Yi-YN, China        | 67  | Our unpublished data |
| Blang-YN, China     | 48  | Our unpublished data |
| DL-YN, China        | 48  | Our unpublished data |
| Dongxiang-GS, China | 63  | Our unpublished data |
| GL-GZ, China        | 102 | Our unpublished data |
| GX-Dong, China      | 100 | Our unpublished data |
| GX-Maonan, China    | 48  | Our unpublished data |
| GX-Mulam, China     | 48  | Our unpublished data |
| GX-Yao, China       | 29  | Our unpublished data |
| GZ-Bouyei, China    | 85  | Our unpublished data |
| GZ-Miao, China      | 35  | Our unpublished data |
| GZ-She, China       | 49  | Our unpublished data |
| GZ-Shui, China      | 64  | Our unpublished data |
| GZ-Yao, China       | 40  | Our unpublished data |
| Han-GS, China       | 43  | Our unpublished data |

---

---

|                  |     |                      |
|------------------|-----|----------------------|
| Han-JS, China    | 1   | Our unpublished data |
| Han-NX, China    | 111 | Our unpublished data |
| Han-SX, China    | 2   | Our unpublished data |
| Hainan-Li, China | 59  | Our unpublished data |
| HN-Miao, China   | 49  | Our unpublished data |
| HN-Tujia, China  | 46  | Our unpublished data |
| HN-Yao, China    | 52  | Our unpublished data |
| Hui-QH, China    | 33  | Our unpublished data |
| Hui-GS, China    | 21  | Our unpublished data |
| IM-Buryat, China | 59  | Our unpublished data |
| IM-Man, China    | 122 | Our unpublished data |
| IM-Xibe, China   | 49  | Our unpublished data |
| Li-HI, China     | 216 | Our unpublished data |
| LN-Man, China    | 31  | Our unpublished data |
| Han-BJ, China    | 45  | Our unpublished data |
| Han-QH, China    | 142 | Our unpublished data |
| QH-Tu, China     | 64  | Our unpublished data |
| QJ-YN, China     | 40  | Our unpublished data |
| Sala-QH, China   | 16  | Our unpublished data |
| XM, China        | 40  | Our unpublished data |
| YN-Bai, China    | 66  | Our unpublished data |
| YN-Blang, China  | 37  | Our unpublished data |
| YN-Dai, China    | 85  | Our unpublished data |
| YN-Hani, China   | 44  | Our unpublished data |
| YN-Jino, China   | 31  | Our unpublished data |
| YN-Kucong, China | 34  | Our unpublished data |
| YN-Lisu, China   | 43  | Our unpublished data |
| YN-Mosuo, China  | 64  | Our unpublished data |
| YN-Naxi, China   | 56  | Our unpublished data |
| YN-Pumi, China   | 59  | Our unpublished data |
| YN-Yi, China     | 90  | Our unpublished data |
| Zhuang-GX, China | 79  | Our unpublished data |
| Han-GD, China    | 105 | 44                   |
| HHT-NM, China    | 107 | 45                   |
| LQ-NM, China     | 48  | 45                   |
| TH-YN, China     | 46  | 45                   |
| AC, China        | 6   | 46                   |
| BG, China        | 32  | 46                   |
| BU, China        | 31  | 46                   |
| CL, China        | 30  | 46                   |
| CU, China        | 30  | 46                   |
| CX, China        | 25  | 46                   |
| CY, China        | 12  | 46                   |
| DA, China        | 56  | 46                   |

---

---

|                          |     |    |
|--------------------------|-----|----|
| DG, China                | 40  | 46 |
| DN, China                | 10  | 46 |
| GA, China                | 42  | 46 |
| HL, China                | 34  | 46 |
| HS, China                | 30  | 46 |
| JM, China                | 27  | 46 |
| LC, China                | 30  | 46 |
| LG, China                | 31  | 46 |
| LL, China                | 4   | 46 |
| LQ, China                | 25  | 46 |
| MK, China                | 33  | 46 |
| ML, China                | 39  | 46 |
| MN, China                | 32  | 46 |
| MO, China                | 29  | 46 |
| MQ, China                | 17  | 46 |
| PO, China                | 34  | 46 |
| PY, China                | 30  | 46 |
| RG, China                | 31  | 46 |
| TN, China                | 30  | 46 |
| WG, China                | 14  | 46 |
| WS, China                | 33  | 46 |
| YR, China                | 15  | 46 |
| HAN- Chaoshan, GD, China | 102 | 47 |
| HAN- Meizhou, GD, China  | 170 | 47 |
| Northern-Han, China      | 60  | 48 |
| Japanese_Honshu, Japan   | 82  | 48 |
| Indonesian, Indonesian   | 54  | 48 |
| Koryak-KMAN, Koryak      | 110 | 48 |
| Japanese_Kyushu, Japan   | 104 | 48 |
| Malaysian-MAL, Malaysian | 52  | 48 |
| Nivkhi, Nivkhi           | 57  | 48 |
| Okinawa, Japan           | 45  | 48 |
| Philippine, Philippine   | 29  | 48 |
| Philippine, Philippine   | 30  | 48 |
| Kam, China               | 72  | 49 |
| Laka, China              | 67  | 49 |
| Mien, China              | 29  | 49 |
| Mulam, China             | 27  | 49 |
| Pinghua_Han, China       | 39  | 49 |
| Pinghua_Han, China       | 48  | 49 |
| Pinghua_Han, China       | 111 | 49 |
| Zhuang_GB, China         | 54  | 49 |
| Zhuang_GB, China         | 4   | 49 |
| Zhuang_GB, China         | 9   | 49 |

---



---

|                                    |      |                      |
|------------------------------------|------|----------------------|
| Zhuang_GB, China                   | 10   | 49                   |
| Bunun, China                       | 18   | 50                   |
| Atayal, China                      | 18   | 50                   |
| Amis, China                        | 21   | 50                   |
| Paiwan, China                      | 21   | 50                   |
| Undefined, Taiwan China            | 64   | 51                   |
| Han-JS, China                      | 99   | Our unpublished data |
| HSK-XJ, China                      | 44   | Our unpublished data |
| Kirgiz-XJ, China                   | 60   | Our unpublished data |
| Mg-XJ, China                       | 96   | Our unpublished data |
| Tajik-XJ, China                    | 56   | Our unpublished data |
| Uyu-XJ, China                      | 274  | Our unpublished data |
| Uzbek-XJ, China                    | 46   | Our unpublished data |
| Han-HLJ, China                     | 180  | Our unpublished data |
| Han-SX, China                      | 220  | Our unpublished data |
| Han-JL, China                      | 199  | Our unpublished data |
| Han-LN, China                      | 191  | Our unpublished data |
| Han-HN, China                      | 1502 | 52                   |
| Han-YN, China                      | 396  | Our unpublished data |
| Han-SN, China                      | 398  | Our unpublished data |
| Han-AH, China                      | 375  | Our unpublished data |
| Han cancer of the esophagus, China | 190  | 53                   |
| Han cancer of the esophagus, China | 106  | Our unpublished data |
| Han-SC, China                      | 556  | Our unpublished data |
| Han-SC, China                      | 214  | Our unpublished data |
| Han-SC, China                      | 312  | Our unpublished data |
| Koreans 103, South Korea           | 103  | 54                   |
| ZA_Chamdo_Ji, China                | 29   | 55                   |
| ZA_Lhasa_Ji, China                 | 44   | 55                   |
| ZA_Nyingchi_Ji, China              | 52   | 55                   |
| ZA_Shigatse_Ji, China              | 29   | 55                   |
| ZA_Shannan_Ji, China               | 55   | 55                   |
| ZA_Nakchu_Ji, China                | 5    | 55                   |
| Tib_Ji, China                      | 73   | 55                   |
| Tibetan, China                     | 156  | 56                   |
| Korean, South Korea                | 694  | 57                   |
| HA, Shandong, China                | 253  | Our unpublished data |
| HA, Neimeng, China                 | 141  | Our unpublished data |
| Dongbei, China                     | 249  | Our unpublished data |
| QI, Sichuan, China                 | 60   | Our unpublished data |
| <b><i>Southeast Asia</i></b>       |      |                      |
| Vietnamese, Vietnam                | 42   | 5                    |
| Thais, Thailand                    | 40   | 5                    |
| Vietnamese, Vietnam                | 187  | 58                   |

---

---

|                                              |     |                                               |
|----------------------------------------------|-----|-----------------------------------------------|
| Burman, Karen, Myanmar                       | 327 | 59                                            |
| Thai LHON, Thailand                          | 42  | Tharaphan et al. GenBank<br>DQ149024-DQ149065 |
| Indonesian, Sumatra, Pekanbaru,<br>Indonesia | 55  | 60                                            |
| Indonesian, Sumatra, Medan,<br>Indonesia     | 44  | 60                                            |
| Malaysian, Semang, Malaysia                  | 263 | 60                                            |
| Malaysian, Melayu, Malaysia                  | 4   | 60                                            |
| Vietnamese, Vietnam                          | 2   | 8                                             |
| Samoan, Samoa                                | 9   | 8                                             |
| Philippines, Philippines                     | 3   | 8                                             |
| Borneo, Borneo                               | 13  | 8                                             |
| Java, Java                                   | 2   | 8                                             |
| Burmans, Myanmar                             | 32  | Our unpublished data                          |
| Burmans, Myanmar                             | 54  | Our unpublished data                          |
| Burmans, Myanmar                             | 51  | Our unpublished data                          |
| Burmans, Myanmar                             | 122 | Our unpublished data                          |
| Burmans, Myanmar                             | 69  | Our unpublished data                          |
| Burmans, Myanmar                             | 72  | Our unpublished data                          |
| Chin, Myanmar                                | 58  | Our unpublished data                          |
| Chin, Myanmar                                | 13  | Our unpublished data                          |
| Chin, Myanmar                                | 187 | Our unpublished data                          |
| Naga, Myanmar                                | 30  | Our unpublished data                          |
| Naga, Myanmar                                | 39  | Our unpublished data                          |
| Naga, Myanmar                                | 32  | Our unpublished data                          |
| Rakhine, Myanmar                             | 24  | Our unpublished data                          |
| Rakhine, Myanmar                             | 63  | Our unpublished data                          |
| Akha, Thailand                               | 91  | 61                                            |
| Lahu, Thailand                               | 39  | 61                                            |
| Lisu, Thailand                               | 25  | 61                                            |
| Lisu, Thailand                               | 42  | 61                                            |
| Lisu, Thailand                               | 53  | 61                                            |
| Mussur, Thailand                             | 21  | 61                                            |
| Cham, Vietnam                                | 168 | 62                                            |
| Kinh, Vietnam                                | 139 | 62                                            |
| Thai, Thailand                               | 190 | 63                                            |
| Thai, Thailand                               | 32  | 11                                            |
| Cambodia, Cambodia                           | 31  | 64                                            |
| Thai, Thailand                               | 30  | 65                                            |
| Thai, Thailand                               | 44  | 65                                            |
| Lao Song, Thailand                           | 25  | 65                                            |
| ChB, Thailand                                | 20  | 66                                            |
| KhM, Thailand                                | 22  | 66                                            |

---

---

|                               |     |    |
|-------------------------------|-----|----|
| Th_K, Thailand                | 32  | 66 |
| Phuthai, Thailand             | 25  | 65 |
| Chong, Thailand               | 25  | 65 |
| Bangka, Sumatra, Indonesia    | 34  | 67 |
| Batek, Malaysia               | 45  | 67 |
| Jahai, Malaysia               | 39  | 67 |
| Medan, Sumatra, Indonesia     | 42  | 67 |
| Melayu, Malaysia              | 6   | 67 |
| Mendriq, Malaysia             | 31  | 67 |
| Padang, Malaysia              | 24  | 67 |
| Palembang, Sumatra, Indonesia | 50  | 67 |
| Pekanbaru, Sumatra, Indonesia | 52  | 67 |
| Semai, Malaysia               | 6   | 67 |
| Semelai, Malaysia             | 61  | 67 |
| Temiar, Malaysia              | 46  | 67 |
| Temuan, Malaysia              | 33  | 67 |
| Philippine, Philippines       | 61  | 50 |
| Java, Indonesia               | 46  | 50 |
| Banjarmasin, Indonesia        | 89  | 50 |
| Kota Kinabalu, Malaysia       | 61  | 50 |
| Manado, Indonesia             | 89  | 50 |
| Palu, Indonesia               | 38  | 50 |
| Ujung Padang, Indonesia       | 46  | 50 |
| Toraja, Indonesia             | 64  | 50 |
| Bali, Indonesia               | 82  | 50 |
| Mataram, Indonesia            | 44  | 50 |
| Flores, Indonesia             | 2   | 50 |
| Waingapu, Indonesia           | 50  | 50 |
| Alor, Malaysia                | 45  | 50 |
| Ambon, Indonesia              | 43  | 50 |
| Luzon, Philippines            | 168 | 51 |
| Visayas, Philippines          | 103 | 51 |
| Mindanao, Philippines         | 70  | 51 |
| Mal, Malaysia                 | 124 | 68 |
| HA, Singapore                 | 205 | 69 |
| Sakai, Thailand               | 20  | 65 |
| Mussur, Thailand              | 21  | 65 |
| White Karen, Thailand         | 40  | 61 |
| Red Karen, Thailand           | 39  | 61 |
| BK, Thailand                  | 13  | 66 |
| NUL, Thailand                 | 17  | 66 |
| Benu, Malaysia                | 10  | 70 |
| Gopeng, Malaysia              | 22  | 70 |
| Kuala Kurau, Malaysia         | 17  | 70 |

---

---

|                                   |     |                                               |
|-----------------------------------|-----|-----------------------------------------------|
| Lembah Bujang, Malaysia           | 26  | 70                                            |
| Lenggeng, Malaysia                | 12  | 70                                            |
| Machang, Malaysia                 | 24  | 70                                            |
| Kota Bharu, Malaysia              | 5   | 70                                            |
| Muar, Malaysia                    | 17  | 70                                            |
| Parit Buntar, Malaysia            | 16  | 70                                            |
| Parit Buntar, Malaysia            | 1   | 70                                            |
| Pontian, Malaysia                 | 20  | 70                                            |
| Rantau Panjang, Malaysia          | 32  | 70                                            |
| Semerah, Malaysia                 | 13  | 70                                            |
| Sri Menanti, Malaysia             | 22  | 70                                            |
| Yan, Malaysia                     | 11  | 70                                            |
| Laos, Laos                        | 214 | 71                                            |
| <b><i>South Asia</i></b>          |     |                                               |
| Tipperah, India                   | 20  | 72                                            |
| Indians, Jammu and Kashmir, India | 7   | Bhat et al. GenBank AN.<br>AY642034-AY642040  |
| Indian, India                     | 12  | Darvishi et al. GenBank DQ143184-<br>DQ143195 |
| Indian, north India               | 4   | Darvishi et al. GenBank DQ176757-<br>DQ176760 |
| Chakma, India                     | 92  | Our unpublished data                          |
| Ralt, India                       | 104 | Our unpublished data                          |
| Kuki, India                       | 45  | Our unpublished data                          |
| Adi, India                        | 45  | 73                                            |
| Apatani, India                    | 26  | 73                                            |
| Apatani, India                    | 21  | 73                                            |
| Naga, India                       | 43  | 73                                            |
| Nishi, India                      | 44  | 73                                            |
| Garo, India                       | 76  | 74                                            |
| Lyngnga, India                    | 74  | 74                                            |
| Nongtraï, India                   | 27  | 74                                            |
| Maram, India                      | 60  | 74                                            |
| Bhoi, India                       | 29  | 74                                            |
| Khynriam, India                   | 82  | 74                                            |
| War_Khas, India                   | 29  | 74                                            |
| Pnar, India                       | 51  | 74                                            |
| War_Jaint, India                  | 17  | 74                                            |
| Pakistani, Pakistan               | 100 | 75                                            |
| Baluch, Pakistan                  | 39  | 75                                            |
| Brahui, Pakistan                  | 38  | 75                                            |
| Gujarati, India                   | 34  | 75                                            |
| Hazara, Pakistan                  | 23  | 75                                            |
| Hunza Burusho, Pakistan           | 44  | 75                                            |

---

---

|                                          |     |                      |
|------------------------------------------|-----|----------------------|
| Kalash, Pakistan                         | 44  | 75                   |
| Makrani, Pakistan                        | 33  | 75                   |
| Mazandarian, Pakistan                    | 44  | 75                   |
| Pathan, Pakistan                         | 44  | 75                   |
| Sindhi, Pakistan                         | 23  | 75                   |
| Moor, Sri Lanka                          | 43  | 76                   |
| Sinhalese, Sri Lanka                     | 59  | 76                   |
| Indo-European, India                     | 94  | 77                   |
| Dravidian, India                         | 17  | 77                   |
| Kadar, India                             | 7   | 78                   |
| Mixed MD, MDU, TH, India                 | 96  | Our unpublished data |
| Mixed DG, AMK, ARA, CNP, ERI, KAM, India | 400 | Our unpublished data |
| Mixed KAN, KAS, NAT, TNP, ODC, India     | 263 | Our unpublished data |
| Mixed NGL, VRU, VEM, VKD, TN, MX, India  | 190 | Our unpublished data |
| Baduga, India                            | 2   | 79                   |
| Irula, India                             | 16  | 72, 7!               |
| Kota, India                              | 25  | 73                   |
| Kurumba, India                           | 8   | 73                   |
| Kurumba Betta, India                     | 19  | 73                   |
| Kurumba Mullu, Mulla Krumba, India       | 15  | 73                   |
| Oorali, India                            | 3   | 79                   |
| Sakkili, India                           | 6   | 79                   |
| Soligas, India                           | 12  | 73                   |
| Malayalam, India                         | 3   | 80                   |
| Cochin, India                            | 52  | 76                   |
| Cochin Jews, India                       | 37  | 76                   |
| Kattunaiken, India                       | 16  | 73                   |
| Kuruchian, India                         | 46  | 73                   |
| Kuruman Mullu, Mullu Kurunan, India      | 37  | 73                   |
| Paniya, India                            | 11  | 73                   |
| Mixed TVM, India                         | 64  | Our unpublished data |
| Havik, India                             | 38  | 78                   |
| Mukri, India                             | 42  | 78                   |
| Kannada, India                           | 5   | 80                   |
| Koragas, India                           | 31  | 73                   |
| Kuruva, India                            | 25  | 81                   |
| Kurumba Jenu, India                      | 6   | 73                   |
| Yerava, India                            | 53  | 73                   |
| Bhovi, India                             | 30  | 82                   |
| Gowda, India                             | 37  | 82                   |
| Brahmin, India                           | 29  | 82                   |

---

---

|                                        |     |                      |
|----------------------------------------|-----|----------------------|
| Lingayat, India                        | 17  | 82                   |
| Christians, India                      | 21  | 82                   |
| Muslim, India                          | 24  | 82                   |
| Siddi, India                           | 7   | 83                   |
| Telugu, Andhra Pradesh, Ind, TE, India | 15  | 80, 84, 85           |
| Lambadi, India                         | 75  | 84                   |
| Andh, AndhSA, AndhX, India             | 95  | 73, 84               |
| Brahmin, India                         | 34  | 84                   |
| Kapu, KTK, KP, India                   | 67  | 84, 85               |
| Madiga, India                          | 24  | 84                   |
| Yadava, India                          | 40  | 84                   |
| Wadabahija, India                      | 8   | 84                   |
| Mala, India                            | 23  | 84                   |
| Kshatriya, India                       | 9   | 84                   |
| Relli, India                           | 20  | 84                   |
| Jalari, India                          | 7   | 84                   |
| Vysya, India                           | 9   | 84                   |
| Chenchu, India                         | 96  | 88                   |
| Koya, India                            | 81  | 88                   |
| Erukula, India                         | 5   | 79                   |
| Yanadi, India                          | 10  | 79                   |
| Thogataveera, India                    | 84  | Our unpublished data |
| Reddy, India                           | 68  | Our unpublished data |
| Pardhi, India                          | 38  | 73                   |
| Thoti, India                           | 39  | 73                   |
| Akhutota, India                        | 22  | 87                   |
| PantaWatkins, India                    | 29  | 87                   |
| Pokanati, India                        | 36  | 87                   |
| Vanne, India                           | 26  | 87                   |
| Irula, India                           | 19  | 89                   |
| Chenchu, India                         | 75  | 90                   |
| Kolam, India                           | 128 | 90                   |
| Gond, India                            | 75  | 90                   |
| Naikpod, N, NP, Z, India               | 83  | 86                   |
| Pardhan, D, I, J, S, W, India          | 170 | 86                   |
| Chitpavan Brahmin, India               | 17  | 91                   |
| Desasth Brahmin, India                 | 15  | 91                   |
| Brahmin, India                         | 9   | 92                   |
| Konkanastha Brahmin, India             | 50  | 76                   |
| Dhangar, India                         | 16  | 91                   |
| Maratha, India                         | 30  | 91-93                |
| Maharashtra, Marathi, India            | 29  | 80, 84               |
| Nav-Baudh, India                       | 17  | 92, 93               |
| Parsi, India                           | 37  | 76                   |

---

---

|                                                                                      |     |                      |
|--------------------------------------------------------------------------------------|-----|----------------------|
| Bohra, India                                                                         | 5   | 93                   |
| Irani, India                                                                         | 5   | 93                   |
| Korku, India                                                                         | 9   | 93                   |
| Madia Gond, India                                                                    | 13  | 93                   |
| Kolam, India                                                                         | 8   | 93                   |
| Kathodi, India                                                                       | 1   | 79                   |
| Koli, India                                                                          | 6   | 79                   |
| Sikh, India                                                                          | 23  | 73                   |
| Gujarat, India                                                                       | 61  | 75, 76               |
| Brahmin, India                                                                       | 29  | 94                   |
| Khatri, India                                                                        | 11  | 94                   |
| Jat Singh, India                                                                     | 27  | 76, 94               |
| Scheduled caste, India                                                               | 19  | 76, 94               |
| Lobana, India                                                                        | 49  | 84                   |
| Brahmin, India                                                                       | 18  | 76                   |
| Kshatriya, India                                                                     | 22  | 76                   |
| PunjabP, PBAN, PHC, PNIR, PP,<br>PPUR, PPUS, PRAJ, PRAM, PSUR,<br>PSUS, PUSH, India  | 42  | 77, 85               |
| Bhoksa, India                                                                        | 22  | 84                   |
| Tharu, India                                                                         | 31  | 76, 84               |
| MundaMun, India                                                                      | 4   | 79                   |
| KoriKor, India                                                                       | 1   | 79                   |
| Rohidas, India                                                                       | 1   | 79                   |
| Yadava, India                                                                        | 6   | 79                   |
| Bhargava, India                                                                      | 165 | Our unpublished data |
| Chaturvedi, India                                                                    | 82  | Our unpublished data |
| Brahmin Mixed, India                                                                 | 146 | Our unpublished data |
| Uttar Pradesh Brahmin, India                                                         | 23  | 76                   |
| Rajput, India                                                                        | 14  | 79                   |
| Lodhe, India                                                                         | 1   | 79                   |
| HI, U, Uttar Pradesh, USIN, UKIR,<br>UANI, UBHA, UBOB, UCHA, UD,<br>UHC, UJEA, India | 93  | 77, 80, 84           |
| Delhi, India                                                                         | 10  | 85                   |
| Kanet, India                                                                         | 29  | 76                   |
| Rajput, Rajasthan, India                                                             | 33  | 76, 84               |
| Kashmir, India                                                                       | 13  | 84                   |
| Baluch, Pakistan                                                                     | 14  | 75                   |
| Brahui, Pakistan                                                                     | 12  | 75                   |
| Hazara, Pakistan                                                                     | 12  | 75                   |
| Hunza Burusho, Pakistan                                                              | 23  | 75                   |
| KarachiKAR, Pakistan, UR, Pakistan                                                   | 74  | 75, 80, 84           |
| Parsi, Pakistan                                                                      | 23  | 75                   |

---

---

|                                       |     |                      |
|---------------------------------------|-----|----------------------|
| Pathan, Pakistan                      | 23  | 75                   |
| SindhiSI, Pakistan                    | 14  | 75                   |
| Pushtoons, Pakistan                   | 16  | 73                   |
| Makrani, Pakistan                     | 8   | 73                   |
| BI, BD, BHC, BSUY, BVIJ, Bihar, India | 43  | 77, 80, 84           |
| BhumijBhuJ, BM, India                 | 60  | 94, 95               |
| Ho, India                             | 20  | 95                   |
| Kharia, India                         | 39  | 87, 95               |
| KanwarKan, India                      | 6   | 79                   |
| SatnamiSat, India                     | 3   | 79                   |
| SanthalSa, India                      | 45  | 79, 87               |
| AsurAS, India                         | 30  | 87                   |
| Munda, India                          | 23  | 87                   |
| BirhorBir, India                      | 189 | Our unpublished data |
| Munda, India                          | 169 | Our unpublished data |
| Oran, India                           | 169 | Our unpublished data |
| Phariya, India                        | 160 | Our unpublished data |
| Bharia, India                         | 14  | 79                   |
| Gond, Madia Gond, India               | 4   | 79, 89               |
| Oran, India                           | 16  | 79                   |
| Muria, India                          | 12  | 72                   |
| Brahmin, India                        | 16  | 96                   |
| Gope, India                           | 17  | 96                   |
| Juang, India                          | 20  | 96                   |
| Karan, India                          | 14  | 96                   |
| Khandayat, India                      | 14  | 96                   |
| Paroja, India                         | 21  | 96                   |
| Saora, India                          | 17  | 96                   |
| Orisa, India                          | 2   | 84                   |
| BE, Ben, Bengal, India                | 15  | 79, 80, 84           |
| Bengal Brahmin, India                 | 36  | 76                   |
| Bengal Sudra, India                   | 8   | 76                   |
| Rajbhansi, SW, Ra, RJ, India          | 249 | Our unpublished data |
| Kurmi, India                          | 55  | 76                   |
| Lodha, Lodhar, India                  | 68  | 72, 76               |
| Munda, India                          | 6   | 72                   |
| Santhal, India                        | 14  | 72                   |
| Dhimal, India                         | 75  | Our unpublished data |
| Kol, India                            | 73  | Our unpublished data |
| Lachung, India                        | 35  | Our unpublished data |
| Mech, India                           | 45  | Our unpublished data |
| Munda, India                          | 40  | Our unpublished data |
| Oran, India                           | 98  | Our unpublished data |

---



---

|                          |     |                                                        |
|--------------------------|-----|--------------------------------------------------------|
| Phariya, India           | 175 | Our unpublished data                                   |
| Rabha, India             | 49  | Our unpublished data                                   |
| Santhal, India           | 83  | Our unpublished data                                   |
| Toto, India              | 11  | Our unpublished data                                   |
| Mixed, MX, WBX, India    | 409 | Our unpublished data                                   |
| Bodo, India              | 65  | Our unpublished data                                   |
| Muslim, India            | 71  | Our unpublished data                                   |
| Bangladesh, Bangladesh   | 1   | 84                                                     |
| Bang, Bangladesh         | 27  | 73                                                     |
| Mixed, Bangladesh        | 143 | Our unpublished data                                   |
| Great Andamanese, India  | 20  | 97                                                     |
| Jarawa, India            | 4   | 97                                                     |
| Onge, India              | 62  | 97                                                     |
| Nicobarese, India        | 46  | 97, 98                                                 |
| Ao, India                | 19  | 79                                                     |
| Mixed, Bhutan            | 47  | Our unpublished data                                   |
| Mixed, Nepal             | 61  | Our unpublished data                                   |
| Ladakhis-Bud, Kashmir    | 23  | 99                                                     |
| Ladakhis-Mus, Kashmir    | 9   | 99                                                     |
| Shia Muslim, India       | 120 | 100                                                    |
| Sunni Muslim, India      | 131 | 100                                                    |
| Dawoodi Bohra, India     | 62  | 100                                                    |
| Dawoodi Bohra, India     | 50  | 100                                                    |
| Mappla, India            | 61  | 100                                                    |
| Iranian Shia, India      | 48  | 100                                                    |
| Tharu-C I, Nepal         | 57  | 101                                                    |
| Tharu-C II, Nepal        | 76  | 101                                                    |
| Tharu-E, Nepal           | 40  | 101                                                    |
| Nepal-Kathamandu, Nepal  | 200 | Our unpublished data                                   |
| Nepal-East Nepal, Nepal  | 46  | Our unpublished data                                   |
| Tamang, Nepal            | 46  | 56                                                     |
| Newar, Nepal             | 67  | 56                                                     |
| Kathmandu, Nepal         | 77  | 56                                                     |
| <b><i>North Asia</i></b> |     |                                                        |
| Besermians, Udmurtia     | 41  | Grosheva et al. GenBank AN.<br>KF380839-KF380879       |
| Mongolian, Mongolia      | 47  | 5                                                      |
| Volga-Turkic, Russia     | 2   | Zaporozhchenko et al. GenBank AN.<br>DQ656492-DQ656493 |
| Aznakaevo, Aznakaevo     | 71  | 102                                                    |
| Buinsk, Buinsk           | 125 | 102                                                    |
| Mongoloid, Mongolia      | 103 | 103                                                    |
| AEG, Mongolia            | 39  | 104                                                    |
| PDEG, Mongolia           | 124 | 104                                                    |

---

---

|                                  |     |     |
|----------------------------------|-----|-----|
| PDM, Mongolia                    | 104 | 104 |
| PDY, Mongolia                    | 44  | 104 |
| Mongoloid, Mongolian             | 46  | 104 |
| Buryat, South Siberia            | 40  | 105 |
| Tuvinian, South Siberia          | 36  | 105 |
| Russian, north-eastern Siberia   | 50  | 106 |
| Ukrainian, north-eastern Siberia | 18  | 106 |
| Altaian, South Siberia           | 110 | 107 |
| Khakassian, South Siberia        | 53  | 107 |
| Buryat, South Siberia            | 91  | 107 |
| Sojot, South Siberia             | 30  | 107 |
| Todjin, South Siberia            | 48  | 107 |
| Tuvinian, South Siberia          | 90  | 107 |
| Tofalar, South Siberia           | 58  | 107 |
| Buryat, Ulan-Ude                 | 126 | 108 |
| Yakut, Yakutsk                   | 117 | 108 |
| Yakut, northeastern Siberia      | 191 | 109 |
| Even, Russia                     | 65  | 110 |
| Koryak, Russia                   | 35  | 110 |
| Yakutian, Russia                 | 22  | 110 |
| Kets, Sulomai and Turukhansk     | 38  | 111 |
| Ngana-sans, Dudinka              | 24  | 111 |
| Ba, bashkir                      | 221 | 112 |
| Ch, chuvash                      | 55  | 112 |
| Er, erza-moksha                  | 102 | 112 |
| Ko, komi                         | 138 | 112 |
| Ma, mari                         | 139 | 112 |
| Ta, tatar                        | 228 | 112 |
| Ud, udmurt                       | 102 | 112 |
| TB, Southern Siberia             | 72  | 113 |
| TV, Southern Siberia             | 96  | 113 |
| BR, Southern Siberia             | 25  | 113 |
| TF, Southern Siberia             | 46  | 113 |
| EV, Southern Siberia             | 37  | 113 |
| NG, Southern Siberia             | 33  | 113 |
| UL, Southern Siberia             | 87  | 113 |
| NV, Southern Siberia             | 56  | 113 |
| UD, Southern Siberia             | 46  | 113 |
| Mansi, Northwest Siberia         | 98  | 111 |
| Nga, Arctic Siberians            | 39  | 114 |
| Ind, Arctic Siberians            | 82  | 114 |
| Kolyma, Arctic Siberians         | 18  | 114 |
| Chv, Arctic Siberians            | 32  | 114 |
| Chu, Arctic Siberians            | 182 | 114 |

---

|                                                            |     |     |
|------------------------------------------------------------|-----|-----|
| Sir, Arctic Siberians                                      | 37  | 114 |
| Cha, Arctic Siberians                                      | 50  | 114 |
| Nau, Arctic Siberians                                      | 39  | 114 |
| Ale, Arctic Siberians                                      | 36  | 114 |
| Buryat, Russia                                             | 61  | 48  |
| Even, Russia                                               | 35  | 48  |
| Chelkan, Northern Altaians                                 | 91  | 115 |
| Kumandin, Northern Altaians                                | 52  | 115 |
| Tubalar, Northern Altaians                                 | 71  | 115 |
| Altai-kizhi , Southern Altaians                            | 276 | 115 |
| Barghuts, Hulun Buir Aimak ,Inner<br>Mongolia, China       | 149 | 116 |
| Altaiian Kazakhs, Kosh-Agach district<br>of Altai Republic | 98  | 116 |
| Mongolians, Ulaanbaatar, Mongolia                          | 47  | 54  |
| Kalmyks, Kalmyk Republic                                   | 110 | 54  |
| Buryats, Buryat Republic                                   | 295 | 54  |
| Khamnigans, Buryat Republic                                | 99  | 54  |
| Tuvinians, Tuva Republic                                   | 105 | 54  |
| East Evenks, Buryat Republic                               | 45  | 54  |
| West Evenks, Krasnoyarsk                                   | 73  | 54  |
| Yakuts, Sakha                                              | 36  | 54  |
| Shors, Kemerovo                                            | 82  | 54  |
| Khakassians, Khakassian Republic                           | 57  | 54  |
| Altaians-Kizhi, South Altai                                | 90  | 54  |
| Telenghits, South Altai                                    | 71  | 54  |
| Teleuts, Kemerovo                                          | 53  | 54  |
| Chukchi, Anadyr, Chukotka<br>Autonomous Okrug              | 15  | 54  |
| Khanty, Lower Ob-river valley                              | 106 | 117 |
| Mansi, Lower Ob-river valley                               | 63  | 117 |
| Complete sequences of C and D, North<br>Asia               | 182 | 118 |
| Complete sequences of North Asia rare<br>haplogroups       | 55  | 116 |
| Tubalar, Altai region                                      | 144 | 119 |
| Evens, northeastern Siberia                                | 87  | 119 |
| Ulchi, Russian Far East                                    | 160 | 119 |
| <b>Central Asia</b>                                        |     |     |
| Bukharan Arabs, Central Asia                               | 20  | 120 |
| Crimean Tatars, Central Asia                               | 20  | 120 |
| Dungans, Central Asia                                      | 16  | 120 |
| Iranians, Central Asia                                     | 20  | 120 |
| Karakalpaks, Central Asia                                  | 20  | 120 |

---

|                                     |     |     |
|-------------------------------------|-----|-----|
| Kazaks, Central Asia                | 20  | 120 |
| Khoreman Uzbeks, Central Asia       | 20  | 120 |
| Kyrgyz, Central Asia                | 20  | 120 |
| Tajiks, Central Asia                | 20  | 120 |
| Turkmen, Central Asia               | 20  | 120 |
| Uighurs, Central Asia               | 16  | 120 |
| Uzbeks, Central Asia                | 20  | 120 |
| Kazakh, Kazakhstan                  | 55  | 120 |
| Kirghiz, Kirghizstan                | 47  | 120 |
| Kirghiz, Kirghizstan                | 48  | 120 |
| Uighur, Kazakhstan                  | 55  | 120 |
| Kurdish, Turkmenistan               | 32  | 75  |
| Shugnan, Tajikistan                 | 44  | 75  |
| Turkmen, Turkmenistan               | 41  | 75  |
| Uzbek, Uzbekistan                   | 42  | 75  |
| FER, Uzbekistan                     | 53  | 121 |
| KAR, Uzbekistan                     | 46  | 121 |
| KAZ, Kazakhstan                     | 256 | 121 |
| KYR, Kyrgyzstan                     | 249 | 121 |
| QAS, Uzbekistan                     | 75  | 121 |
| RUS, Russia                         | 151 | 121 |
| TAJ, Tajikistan                     | 244 | 121 |
| TAS, Uzbekistan                     | 55  | 121 |
| TUR, Turkmenistan                   | 249 | 121 |
| XOR, Uzbekistan                     | 99  | 121 |
| KAR, Uzbekistan                     | 55  | 122 |
| KAZ, Kazakhstan                     | 50  | 122 |
| OTU, Uzbekistan/Turkmenistan border | 53  | 122 |
| TUR, Uzbekistan/Turkmenistan border | 51  | 122 |
| UZB, Karakalpakia                   | 40  | 122 |
| Kazakhstan, Kazakhstan              | 27  | 123 |
| Tajiks, Tajikistan                  | 44  | 54  |
| <i>West Asia</i>                    |     |     |
| Kurdish Muslims, Baghdad, Iraq      | 15  | 124 |
| Assyrian Christians, Baghdad, Iraq  | 22  | 124 |
| Arab Muslims, Baghdad, Iraq         | 128 | 124 |
| Mandaean Arabs, Baghdad, Iraq       | 17  | 124 |
| Kuwaiti, Kuwait                     | 381 | 125 |
| Yemeni, Yemen                       | 50  | 1   |
| Bedouin, Near East                  | 58  | 3   |
| Cherkes, Near East                  | 8   | 3   |
| Druze, Near East                    | 77  | 3   |
| Palestinian, Near East              | 110 | 3   |
| Turkish, Turkey                     | 50  | 75  |

---

---

|                                                         |     |                                                 |
|---------------------------------------------------------|-----|-------------------------------------------------|
| BAL, Georgia                                            | 20  | 75                                              |
| CHE, Georgia                                            | 18  | 75                                              |
| GEO, Georgia                                            | 20  | 75                                              |
| Gilaki, Iran                                            | 37  | 75                                              |
| Kurdish, Iran                                           | 20  | 75                                              |
| Lur, Iran                                               | 17  | 75                                              |
| Mazandarian, Iran                                       | 21  | 75                                              |
| Persian, Iran                                           | 42  | 75                                              |
| Turkish, Azerbaijan                                     | 40  | 75                                              |
| AFG, Afghanistan                                        | 98  | 121                                             |
| Persians, eastern Iran                                  | 82  | 54                                              |
| Kurds, northwestern Iran                                | 25  | 54                                              |
| <b><i>Europe</i></b>                                    |     |                                                 |
| Basque, Navarre, Spain                                  | 110 | 126                                             |
| Autochthonous Basque lineages, Spain                    | 56  | Cardoso et al. GenBank AN.<br>JX669072-JX669127 |
| Autochthonous Basque lineages, Spain                    | 51  | Cardoso et al. GenBank AN.<br>JX669021-JX669071 |
| Basque, Northern Navarre, Spain                         | 100 | 127                                             |
| Basque, Basque Country northern Spain                   | 106 | 127                                             |
| Basque, Franco-Cantabrian Region                        | 35  | 127                                             |
| Basque, Basque Country northern Spain                   | 55  | 127                                             |
| Patients of sporadic prostate cancer, Southwest Europe  | 239 | 128                                             |
| Controls of sporadic prostate cancer, Southwest Europe  | 150 | 128                                             |
| Patients with schizophrenia and bipolar Disorder, Italy | 89  | 129                                             |
| T2DM patients, Marche, Italy                            | 466 | 130                                             |
| Controls, Marche, Italy                                 | 438 | 130                                             |
| French, France                                          | 142 | 131                                             |
| Veneto speakers, Barco, Veneto, Italy                   | 30  | 132                                             |
| Veneto speakers, Barco, Veneto, Italy                   | 38  | 132                                             |
| Spanish, Pas Valley, Spain                              | 61  | 133                                             |
| Etruscans, Tuscany, Italy                               | 322 | 134                                             |
| Greek, northern Greece                                  | 319 | 135                                             |
| Cyprus, Cyprus                                          | 91  | 135                                             |
| Remains from the Alps, Italy                            | 3   | 136                                             |
| Italian, Trexenta, Sardinia, Italy                      | 47  | Calo et al. GenBank 81669-<br>DQ0DQ081715       |
| Italian, Tuscany, Italy                                 | 61  | Varesi et al. GenBank 81608-<br>DQ0DQ081668     |

---

|                                        |      |                                                |
|----------------------------------------|------|------------------------------------------------|
| Italian, San Pietro, Sardinia, Italy   | 44   | Varesi et al. GenBank<br>DQ081564-DQ081607     |
| Italian, Sant Antioco, Sardinia, Italy | 42   | Falchi et al. GenBank<br>DQ081522-DQ081563     |
| Italian, Gallura, Sardinia, Italy      | 50   | Varesi et al. GenBank<br>DQ081420-DQ081469     |
| French, South Corsica, France          | 53   | Giovannoni et al. GenBank<br>DQ081367-DQ081419 |
| Spanish, Balears, Spain                | 67   | Varesi et al. GenBank<br>DQ081300-DQ081366     |
| Andalusian, Spain                      | 66   | Via et al. GenBank<br>DQ081234-DQ081299        |
| Italian, Nuoro, Sardinia, Italy        | 51   | Varesi et al. GenBank<br>DQ067827-DQ067877     |
| Ancient Cumanians, Hungary             | 11   | 137                                            |
| Magyars/Hungarians, Carpathian basin   | 35   | Kalmar et al. GenBank<br>AF487581-AF487615     |
| Nefedjevo inhabitant, Russia           | 8    | Buzhilova et al. GenBank<br>AF466686-AF466693  |
| Belorussian, Belarus                   | 55   | Belyaeva et al. GenBank<br>AY005336-AY005390   |
| Scotch, Scotland, UK                   | 1341 | 138                                            |
| Norse, Norway                          | 323  | 138                                            |
| Pol, Northern Poland                   | 436  | 139                                            |
| Rus, Russia                            | 201  | 139                                            |

### Supplementary References

- 1 Non, A. L., Al-Meerri, A., Raaum, R. L., Sanchez, L. F. & Mulligan, C. J. Mitochondrial DNA reveals distinct evolutionary histories for Jewish populations in Yemen and Ethiopia. *Am. J. Phys. Anthropol.* **144**, 1-10 (2011).
- 2 Behar, D. M. *et al.* The matrilineal ancestry of Ashkenazi Jewry: portrait of a recent founder event. *Am. J. Hum. Genet.* **78**, 487-497 (2006).
- 3 Behar, D. M. *et al.* Counting the founders: the matrilineal genetic ancestry of the Jewish Diaspora. *PLoS ONE* **3**, e2062 (2008).
- 4 Brandstätter, A. *et al.* Mitochondrial DNA control region variation in Ashkenazi Jews from Hungary. *Forensic Sci Int Genet* **2**, e4-e6 (2008).
- 5 Jin, H.-J., Tyler-Smith, C. & Kim, W. The peopling of Korea revealed by analyses of mitochondrial DNA and Y-chromosomal markers. *PLoS ONE* **4**, e4210 (2009).
- 6 Irwin, J. A. *et al.* Investigation of heteroplasmy in the human mitochondrial DNA control region: a synthesis of observations from more than 5000 global population samples. *J. Mol. Evol.* **68**, 516-527 (2009).
- 7 Xu, Z. *et al.* Mitochondrial DNA evidence for a diversified origin of workers building mausoleum for first emperor of China. *PLoS ONE* **3**, e3275 (2008).
- 8 Koji Lum, J. & Cann, R. L. mtDNA lineage analyses: origins and migrations of Micronesians

- and Polynesians. *Am. J. Phys. Anthropol.* **113**, 151-168 (2000).
- 9 Zhao, M. *et al.* Mitochondrial genome evidence reveals successful Late Paleolithic settlement on the Tibetan Plateau. *Proc. Natl. Acad. Sci.* **106**, 21230-21235 (2009).
  - 10 Qin, Z. *et al.* A mitochondrial revelation of early human migrations to the Tibetan Plateau before and after the last glacial maximum. *Am. J. Phys. Anthropol.* **143**, 555-569 (2010).
  - 11 Yao, Y. G. *et al.* Genetic relationship of Chinese ethnic populations revealed by mtDNA sequence diversity. *Am. J. Phys. Anthropol.* **118**, 63-76 (2002).
  - 12 Wen, B. *et al.* Analyses of genetic structure of Tibeto-Burman populations reveals sex-biased admixture in southern Tibeto-Burmans. *Am. J. Hum. Genet.* **74**, 856-865 (2004).
  - 13 Yao, Y. G. & Zhang, Y. P. Phylogeographic analysis of mtDNA variation in four ethnic populations from Yunnan Province: new data and a reappraisal. *J. Hum. Genet.* **47**, 311-318 (2002).
  - 14 Qian, Y. P. *et al.* Mitochondrial DNA polymorphisms in Yunnan nationalities in China. *J. Hum. Genet.* **46**, 211-220 (2001).
  - 15 Yao, Y. G., Kong, Q. P., Wang, C. Y., Zhu, C. L. & Zhang, Y. P. Different matrilineal contributions to genetic structure of ethnic groups in the Silk Road region in China. *Mol. Biol. Evol.* **21**, 2265-2280 (2004).
  - 16 Liu, X. & Li, S. Polymorphism of mitochondrial DNA D-loop region in Chinese Baoan ethnic group. *Journal of the Fourth Military Medical University* **20**, 004 (2003).
  - 17 Liu, X., Chen, T. & Li, S. Sequence polymorphism of human mitochondrial DNA control region in Chinese Dongxiang unrelated individuals. *Journal of Medical Colleges of PLA* **19** (2004).
  - 18 Liu, X. & Li, S. Study on polymorphisms of mitochondrial DNA D-loop region in the Sala population in China. *J Xi'an Jiaotong Univ* **25** (2004).
  - 19 Wang, W., Wise, C., Baric, T., Black, M. L. & Bittles, A. H. The origins and genetic structure of three co-resident Chinese Muslim populations: the Salar, Bo'an and Dongxiang. *Hum. Genet.* **113**, 244-252 (2003).
  - 20 Liu, X. & Li, S. Mitochondrial DNA Polymorphism in control region from Chinese Yugu population. *J Xi'an Jiaotong Univ* **16** (2004).
  - 21 Li, C. *et al.* Evidence that a West-East admixed population lived in the Tarim Basin as early as the early Bronze Age. *BMC Biol.* **8**, 15 (2010).
  - 22 Xie, C. Z. *et al.* Quantification Polymerase Chain Reaction Designs to Analyze the Ancient Deoxyribonucleic Acid of Xiaohe Cemetery, Xinjiang. *Chinese Journal of Analytical Chemistry* **35**, 5 (2007).
  - 23 Cui, Y., Li, C., Gao, S., Xie, C. & Zhou, H. Early Eurasian migration traces in the Tarim Basin revealed by mtDNA polymorphisms. *Am. J. Phys. Anthropol.* **142**, 558-564, (2010).
  - 24 Cui, Y. *et al.* 新疆塔里木盆地早期铁器时代人群的母系遗传结构分析. *Chinese Science Bulletin* **54**, 2912-2919 (2009).
  - 25 He, H. *et al.* Study on mtDNA polymorphism of ancient human bone from Hami of Xinjiang, Chian 3200BP. *Acta Anthropologica Sinica* **22** (2003).
  - 26 Kong, Q. P. *et al.* Mitochondrial DNA sequence polymorphisms of five ethnic populations from northern China. *Hum. Genet.* **113**, 391-405 (2003).
  - 27 Zhang, Y. J., Xu, Q. S., Zheng, Z. J., Lin, H. Y. & Lee, J. B. Haplotype diversity in mitochondrial DNA hypervariable region I, II and III in northeast China Han. *Forensic Sci. Int.*

- 149**, 267-269 (2005).
- 28 Wen, B. *et al.* Genetic evidence supports demic diffusion of Han culture. *Nature* **431**, 302-305 (2004).
- 29 Yao, Y. G., Kong, Q. P., Bandelt, H.-J., Kivisild, T. & Zhang, Y. P. Phylogeographic differentiation of mitochondrial DNA in Han Chinese. *Am. J. Hum. Genet.* **70**, 635-651 (2002).
- 30 Yao, Y. G., Kong, Q. P., Man, X. Y., Bandelt, H.-J. & Zhang, Y. P. Reconstructing the evolutionary history of China: a caveat about inferences drawn from ancient DNA. *Mol. Biol. Evol.* **20**, 214-219 (2003).
- 31 Tajima, A. *et al.* Mitochondrial DNA polymorphisms in nine aboriginal groups of Taiwan: implications for the population history of aboriginal Taiwanese. *Hum. Genet.* **113**, 24-33 (2003).
- 32 Tsai, L. *et al.* Sequence polymorphism of mitochondrial D-loop DNA in the Taiwanese Han population. *Forensic Sci. Int.* **119**, 239-247 (2001).
- 33 Kivisild, T. *et al.* The emerging limbs and twigs of the East Asian mtDNA tree. *Mol. Biol. Evol.* **19**, 1737-1751 (2002).
- 34 Nishimaki, Y. *et al.* Sequence polymorphism in the mtDNA HV1 region in Japanese and Chinese. *Leg Med* **1**, 238-249 (1999).
- 35 Oota, H. *et al.* Extreme mtDNA homogeneity in continental Asian populations. *Am. J. Phys. Anthropol.* **118**, 146-153 (2002).
- 36 Wen, B. *et al.* Genetic structure of Hmong-Mien speaking populations in East Asia as revealed by mtDNA lineages. *Mol. Biol. Evol.* **22**, 725-734 (2005).
- 37 Koyama, H. *et al.* Mitochondrial sequence haplotype in the Japanese population. *Forensic Sci. Int.* **125**, 93-96 (2002).
- 38 Imaizumi, K., Parsons, T. J., Yoshino, M. & Holland, M. A new database of mitochondrial DNA hypervariable regions I and II sequences from 162 Japanese individuals. *Int. J. Legal Med.* **116**, 68-73 (2002).
- 39 Maruyama, S., Minaguchi, K. & Saitou, N. Sequence polymorphisms of the mitochondrial DNA control region and phylogenetic analysis of mtDNA lineages in the Japanese population. *Int. J. Legal Med.* **117**, 218-225 (2003).
- 40 Nagai, A., Nakamura, I., Shiraki, F., Bunai, Y. & Ohya, I. Sequence polymorphism of mitochondrial DNA in Japanese individuals from Gifu Prefecture. *Leg Med* **5**, S210-S213 (2003).
- 41 Seo, Y., Stradmann-Bellinghausen, B., Rittner, C., Takahama, K. & Schneider, P. M. Sequence polymorphism of mitochondrial DNA control region in Japanese. *Forensic Sci. Int.* **97**, 155-164 (1998).
- 42 Mabuchi, T., Susukida, R., Kido, A. & Oya, M. Typing the 1.1 kb control region of human mitochondrial DNA in Japanese individuals. *J. Forensic Sci.* **52**, 355-363 (2007).
- 43 Horai, S. *et al.* mtDNA polymorphism in East Asian Populations, with special reference to the peopling of Japan. *Am. J. Hum. Genet.* **59**, 579 (1996).
- 44 Chen, F. *et al.* Analysis of mitochondrial DNA polymorphisms in Guangdong Han Chinese. *Forensic Sci Int Genet* **2**, 150-153 (2008).
- 45 Cheng, B. *et al.* Genetic imprint of the Mongol: signal from phylogeographic analysis of mitochondrial DNA. *J. Hum. Genet.* **53**, 905-913 (2008).



- 46 Li, H. *et al.* Mitochondrial DNA diversity and population differentiation in southern East Asia. *Am. J. Phys. Anthropol.* **134**, 481-488 (2007).
- 47 Wang, W. Z. *et al.* Tracing the origins of Hakka and Chaoshanese by mitochondrial DNA analysis. *Am. J. Phys. Anthropol.* **141**, 124-130 (2010).
- 48 Tajima, A. *et al.* Genetic origins of the Ainu inferred from combined DNA analyses of maternal and paternal lineages. *J. Hum. Genet.* **49**, 187-193 (2004).
- 49 Gan, R. J. *et al.* Pinghua population as an exception of Han Chinese's coherent genetic structure. *J. Hum. Genet.* **53**, 303-313 (2008).
- 50 Hill, C. *et al.* A mitochondrial stratigraphy for island southeast Asia. *Am. J. Hum. Genet.* **80**, 29-43 (2007).
- 51 Tabbada, K. A. *et al.* Philippine mitochondrial DNA diversity: a populated viaduct between Taiwan and Indonesia? *Mol. Biol. Evol.* **27**, 21-31 (2010).
- 52 Zhang, W. *et al.* A Matrilineal Genetic Legacy from the Last Glacial Maximum Confers Susceptibility to Schizophrenia in Han Chinese. *J. Genet. Genomics.* **41**, 397-407 (2014).
- 53 Liu, J. *et al.* Deciphering the signature of selective constraints on cancerous mitochondrial genome. *Mol. Biol. Evol.* **29**, 1255-1261 (2012).
- 54 Derenko, M. *et al.* Phylogeographic Analysis of Mitochondrial DNA in Northern Asian Populations. *Am. J. Hum. Genet.* **81**, 1025-1041 (2007).
- 55 Ji, F. *et al.* Mitochondrial DNA variant associated with Leber hereditary optic neuropathy and high-altitude Tibetans. *Proc. Natl. Acad. Sci.* **109**, 7391-7396 (2012).
- 56 Gayden, T. *et al.* The Himalayas: Barrier and conduit for gene flow. *Am. J. Phys. Anthropol.*, n/a-n/a (2013).
- 57 Lee, H. Y. *et al.* East Asian mtDNA haplogroup determination in Koreans: Haplogroup-level coding region SNP analysis and subhaplogroup-level control region sequence analysis. *Electrophoresis* **27**, 4408-4418 (2006).
- 58 Irwin, J. A. *et al.* Mitochondrial control region sequences from a Vietnamese population sample. *Int. J. Legal Med.* **122**, 257-259 (2008).
- 59 Summerer M, *et al.* Large-scale mitochondrial DNA analysis in Southeast Asia reveals evolutionary effects of cultural isolation in the multi-ethnic population of Myanmar. *BMC Evol. Biol.* **14**, 17 (2014).
- 60 Macaulay, V. *et al.* Single, rapid coastal settlement of Asia revealed by analysis of complete mitochondrial genomes. *Science (80- )* **308**, 1034-1036 (2005).
- 61 Oota, H., Settheetham-Ishida, W., Tiwawech, D., Ishida, T. & Stoneking, M. Human mtDNA and Y-chromosome variation is correlated with matrilineal versus patrilineal residence. *Nat. Genet.* **29**, 20-21 (2001).
- 62 Peng, M. S. *et al.* Tracing the Austronesian footprint in Mainland Southeast Asia: a perspective from mitochondrial DNA. *Mol. Biol. Evol.* **27**, 2417-2430 (2010).
- 63 Zimmermann, B. *et al.* Forensic and phylogeographic characterization of mtDNA lineages from northern Thailand (Chiang Mai). *Int. J. Legal Med.* **123**, 495-501 (2009).
- 64 Black, M., Dufall, K., Wise, C., Sullivan, S. & Bittles, A. Genetic ancestries in northwest Cambodia. *Ann. Hum. Biol.* **33**, 620-627 (2006).
- 65 Fucharoen, G., Fucharoen, S. & Horai, S. Mitochondrial DNA polymorphisms in Thailand. *J. Hum. Genet.* **46**, 115-125 (2001).

- 66 Lertrit, P. *et al.* Genetic history of Southeast Asian populations as revealed by ancient and modern human mitochondrial DNA analysis. *Am. J. Phys. Anthropol.* **137**, 425-440, (2008).
- 67 Hill, C. *et al.* Phylogeography and ethnogenesis of aboriginal Southeast Asians. *Mol. Biol. Evol.* **23**, 2480-2491 (2006).
- 68 Maruyama, S., Nohira-Koike, C., Minaguchi, K. & Nambiar, P. MtDNA control region sequence polymorphisms and phylogenetic analysis of Malay population living in or around Kuala Lumpur in Malaysia. *Int. J. Legal Med.* **124**, 165-170 (2010).
- 69 Wong, H. Y. *et al.* Sequence polymorphism of the mitochondrial DNA hypervariable regions I and II in 205 Singapore Malays. *Leg Med* **9**, 33-37 (2007).
- 70 Haslindawaty, A. R. N., Panneerchelvam, S., Edinur, H. A., Norazmi, M. N. & Zafarina, Z. Sequence polymorphisms of mtDNA HV1, HV2, and HV3 regions in the Malay population of Peninsular Malaysia. *Int. J. Legal Med.* **124**, 415-426 (2010).
- 71 Bodner, M. *et al.* Southeast Asian diversity: first insights into the complex mtDNA structure of Laos. *BMC Evol. Biol.* **11**, 49 (2011).
- 72 Roychoudhury, S. *et al.* Genomic structures and population histories of linguistically distinct tribal groups of India. *Hum. Genet.* **109**, 339-350 (2001).
- 73 Cordaux, R. *et al.* Mitochondrial DNA analysis reveals diverse histories of tribal populations from India. *Eur. J. Hum. Genet.* **11**, 253-264 (2003).
- 74 Reddy, B. M. *et al.* Austro-Asiatic tribes of Northeast India provide hitherto missing genetic link between South and Southeast Asia. *PLoS ONE* **2**, e1141 (2007).
- 75 Quintana-Murci, L. *et al.* Where west meets east: the complex mtDNA landscape of the southwest and Central Asian corridor. *Am. J. Hum. Genet.* **74**, 827-845 (2004).
- 76 Metspalu, M. *et al.* Most of the extant mtDNA boundaries in south and southwest Asia were likely shaped during the initial settlement of Eurasia by anatomically modern humans. *BMC Genet.* **5**, 26 (2004).
- 77 Sharma, S., Saha, A., Rai, E., Bhat, A. & Bamezai, R. Human mtDNA hypervariable regions, HVR I and II, hint at deep common maternal founder and subsequent maternal gene flow in Indian population groups. *J. Hum. Genet.* **50**, 497-506 (2005).
- 78 Mountain, J. L. *et al.* Demographic history of India and mtDNA-sequence diversity. *Am. J. Hum. Genet.* **56**, 979-992 (1995).
- 79 Thangaraj, K. *et al.* Different population histories of the Mundari-and Mon-Khmer-speaking Austro-Asiatic tribes inferred from the mtDNA 9-bp deletion/insertion polymorphism in Indian populations. *Hum. Genet.* **116**, 507-517 (2005).
- 80 Barnabas, S., Shouche, Y. & Suresh, C. High-Resolution mtDNA Studies of the Indian Population: Implications for Palaeolithic Settlement of the Indian Subcontinent. *Ann. Hum. Genet.* **70**, 42-58 (2006).
- 81 Rajkumar, R. & Kashyap, V. Haplotype diversity in mitochondrial DNA hypervariable regions I and II in three communities of Southern India. *Forensic Sci. Int.* **136**, 79-82 (2003).
- 82 Rajkumar, R. & Kashyap, V. Mitochondrial DNA hypervariable region I and II sequence polymorphism in the Dravidian linguistic group of India. *J. Forensic Sci.* **48**, 227 (2003).
- 83 Thangaraj, K., Ramana, G. V. & Singh, L. Y-chromosome and mitochondrial DNA polymorphisms in Indian populations. *Electrophoresis* **20**, 1743-1747 (1999).
- 84 Kivisild, T. *et al.* Deep common ancestry of Indian and western-Eurasian mitochondrial DNA lineages. *Curr. Biol.* **9**, 1331-1334 (1999).

- 85 Quintana-Murci, L. *et al.* Genetic evidence of an early exit of Homo sapiens sapiens from Africa through eastern Africa. *Nat. Genet.* **23**, 437-441 (1999).
- 86 Thanseem, I. *et al.* Genetic affinities among the lower castes and tribal groups of India: inference from Y chromosome and mitochondrial DNA. *BMC Genet.* **7**, 42 (2006).
- 87 Kumar, V. *et al.* Global patterns in human mitochondrial DNA and Y-chromosome variation caused by spatial instability of the local cultural processes. *PLoS Genet.* **2**, e53 (2006).
- 88 Kivisild, T. *et al.* The genetic heritage of the earliest settlers persists both in Indian tribal and caste populations. *Am. J. Hum. Genet.* **72**, 313-332 (2003).
- 89 Watkins, W. *et al.* Multiple origins of the mtDNA 9-bp deletion in populations of South India. *Am. J. Phys. Anthropol.* **109**, 147-158 (1999).
- 90 Mittal, B. *et al.* Mitochondrial DNA variation and substructure among the tribal populations of Andhra Pradesh, India. *Am. J. Hum. Biol.* **20**, 683-692 (2008).
- 91 Gaikwad, S. & Kashyap, V. Molecular insight into the genesis of ranked caste populations of western India based upon polymorphisms across non-recombinant and recombinant regions in genome. *Genome Biol.* **6**, P10 (2005).
- 92 Roy, S., Thakur, C. & Majumder, P. P. Mitochondrial DNA variation in ranked caste groups of Maharashtra (India) and its implication on genetic relationships and origins. *Ann. Hum. Biol.* **30**, 443-454 (2003).
- 93 Baig, M., Khan, A. & Kulkarni, K. Mitochondrial DNA diversity in tribal and caste groups of Maharashtra (India) and its implication on their genetic origins. *Ann. Hum. Genet.* **68**, 453-460 (2004).
- 94 Kaur, I. *et al.* Genomic diversities and affinities among four endogamous groups of Punjab (India) based on autosomal and mitochondrial DNA polymorphisms. *Hum. Biol.*, 819-836 (2002).
- 95 Banerjee, J., Trivedi, R. & Kashyap, V. Mitochondrial DNA control region sequence polymorphism in four indigenous tribes of Chotanagpur plateau, India. *Forensic Sci. Int.* **149**, 271-274 (2005).
- 96 Sahoo, S. & Kashyap, V. Phylogeography of mitochondrial DNA and Y-Chromosome haplogroups reveal asymmetric gene flow in populations of Eastern India. *Am. J. Phys. Anthropol.* **131**, 84-97 (2006).
- 97 Thangaraj, K. *et al.* Genetic affinities of the Andaman Islanders, a vanishing human population. *Curr. Biol.* **13**, 86-93 (2003).
- 98 Ravi Prasad, B. *et al.* Mitochondrial DNA variation in Nicobarese islanders. *Hum. Biol.* **73**, 715-725 (2001).
- 99 Wirth, T. *et al.* Distinguishing human ethnic groups by means of sequences from Helicobacter pylori: lessons from Ladakh. *Proc. Natl. Acad. Sci.* **101**, 4746-4751 (2004).
- 100 Eaaswarkhanth, M. *et al.* Traces of sub-Saharan and Middle Eastern lineages in Indian Muslim populations. *Eur. J. Hum. Genet.* **18**, 354-363 (2009).
- 101 Fornarino, S. *et al.* Mitochondrial and Y-chromosome diversity of the Tharus (Nepal): a reservoir of genetic variation. *BMC Evol. Biol.* **9**, 154 (2009).
- 102 Malyarchuk, B., Derenko, M., Denisova, G. & Kravtsova, O. Mitogenomic diversity in Tatars from the Volga-Ural region of Russia. *Mol. Biol. Evol.* **27**, 2220-2226 (2010).
- 103 Kolman, C. J., Sambuughin, N. & Bermingham, E. Mitochondrial DNA analysis of Mongolian populations and implications for the origin of New World founders. *Genetics* **142**,

- 1321-1334 (1996).
- 104 Keyser-Tracqui, C., Crubezy, E., Pamzav, H., Varga, T. & Ludes, B. Population origins in Mongolia: genetic structure analysis of ancient and modern DNA. *Am. J. Phys. Anthropol.* **131**, 272-281 (2006).
- 105 Derenko, M. V. *et al.* Mitochondrial DNA variation in two South Siberian Aboriginal populations: implications for the genetic history of North Asia. *Hum. Biol.*, 945-973 (2000).
- 106 Malyarchuk, B. & Derenko, M. Mitochondrial DNA variability in Russians and Ukrainians: Implication to the origin of the Eastern Slavs. *Ann. Hum. Genet.* **65**, 63-78 (2001).
- 107 Derenko, M. *et al.* Diversity of mitochondrial DNA lineages in South Siberia. *Ann. Hum. Genet.* **67**, 391-411 (2003).
- 108 Pakendorf, B. *et al.* Mitochondrial DNA evidence for admixed origins of central Siberian populations. *Am. J. Phys. Anthropol.* **120**, 211-224 (2003).
- 109 Fedorova, S., Bermisheva, M., Villems, R., Maksimova, N. & Khusnutdinova, E. Analysis of mitochondrial DNA haplotypes in yakut population]. *Mol. Biol. (Mosk.)* **37**, 643 (2003).
- 110 Derenko, M. & Shields, G. Diversity of mitochondrial DNA nucleotide sequences in three groups of aboriginal inhabitants of Northern Asia]. *Mol. Biol. (Mosk.)* **31**, 784 (1997).
- 111 Derbeneva, O., Starikovskaia, E., Volod'ko, N., Wallace, D. & Sukernik, R. [Mitochondrial DNA variation in Kets and Nganasans and the early peoples of Northern Eurasia]. *Genetika* **38**, 1554-1560 (2002).
- 112 Bermisheva, M., Tambets, K., Villems, R. & Khusnutdinova, E. [Diversity of mitochondrial DNA haplotypes in ethnic populations of the Volga-Ural region of Russia]. *Mol. Biol. (Mosk.)* **36**, 990-1001 (2001).
- 113 Starikovskaya, E. B. *et al.* Mitochondrial DNA diversity in indigenous populations of the southern extent of Siberia, and the origins of Native American haplogroups. *Ann. Hum. Genet.* **69**, 67-89 (2005).
- 114 Volodko, N. V. *et al.* Mitochondrial genome diversity in arctic Siberians, with particular reference to the evolutionary history of Beringia and Pleistocenic peopling of the Americas. *Am. J. Hum. Genet.* **82**, 1084-1100 (2008).
- 115 Dulik, Matthew C. *et al.* Mitochondrial DNA and Y Chromosome Variation Provides Evidence for a Recent Common Ancestry between Native Americans and Indigenous Altaians. *Am. J. Hum. Genet.* **90**, 229-246 (2012).
- 116 Derenko, M. *et al.* Complete mitochondrial DNA analysis of eastern Eurasian haplogroups rarely found in populations of northern Asia and eastern Europe. *PLoS ONE* **7**, e32179 (2012).
- 117 Pimenoff, V. N. *et al.* Northwest Siberian Khanty and Mansi in the junction of West and East Eurasian gene pools as revealed by uniparental markers. *Eur. J. Hum. Genet.* **16**, 1254-1264 (2008).
- 118 Derenko, M. *et al.* Origin and post-glacial dispersal of mitochondrial DNA haplogroups C and D in northern Asia. *PLoS ONE* **5**, e15214 (2010).
- 119 Sukernik, R. I. *et al.* Mitochondrial genome diversity in the tubalar, even, and ulchi: Contribution to prehistory of native siberians and their affinities to native americans. *Am. J. Phys. Anthropol.* **148**, 123-138 (2012).
- 120 Comas, D. *et al.* Admixture, migrations, and dispersals in Central Asia: evidence from maternal DNA lineages. *Eur. J. Hum. Genet.* **12**, 495-504 (2004).
- 121 Irwin, J. A. *et al.* The mtDNA composition of Uzbekistan: a microcosm of Central Asian

- patterns. *Int. J. Legal Med.* **124**, 195-204 (2010).
- 122 Chaix, R. *et al.* From social to genetic structures in central Asia. *Curr. Biol.* **17**, 43-48 (2007).
- 123 Lalueza-Fox, C. *et al.* Unravelling migrations in the steppe: mitochondrial DNA sequences from ancient Central Asians. *Proc. R. Soc. Lond., B, Biol. Sci.* **271**, 941-948 (2004).
- 124 Al-Zahery, N. *et al.* Characterization of mitochondrial DNA control region lineages in Iraq. *Int. J. Legal Med.* **127**, 373-375 (2013).
- 125 Scheible, M. *et al.* Mitochondrial DNA control region variation in a Kuwaiti population sample. *Forensic Sci Int Genet* **5**, e112-e113 (2011).
- 126 Cardoso, S. *et al.* The maternal legacy of Basques in northern navarre: New insights into the mitochondrial DNA diversity of the Franco-Cantabrian area. *Am. J. Phys. Anthropol.* **145**, 480-488 (2011).
- 127 Cardoso, S. *et al.* The Expanded mtDNA Phylogeny of the Franco-Cantabrian Region Upholds the Pre-Neolithic Genetic Substrate of Basques. *PLoS ONE* **8**, e67835 (2013).
- 128 Álvarez-Cubero, M. J. *et al.* Mitochondrial Haplogroups and Polymorphisms Reveal No Association with Sporadic Prostate Cancer in a Southern European Population. *PLoS ONE* **7**, e41201 (2012).
- 129 Bertolin, C. *et al.* Analysis of complete mitochondrial genomes of patients with schizophrenia and bipolar disorder. *J. Hum. Genet.* **56**, 869-872 (2011).
- 130 Achilli, A. *et al.* Mitochondrial DNA backgrounds might modulate diabetes complications rather than T2DM as a whole. *PLoS ONE* **6**, e21029 (2011).
- 131 Pierron, D. *et al.* New evidence of a mitochondrial genetic background paradox: impact of the J haplogroup on the A3243G mutation. *BMC Med. Genet.* **9**, 41 (2008).
- 132 Mogentale-Profizi, N. *et al.* Mitochondrial DNA sequence diversity in two groups of Italian Veneto speakers from Veneto. *Ann. Hum. Genet.* **65**, 153-166 (2001).
- 133 Cardoso, S. *et al.* Variability of the entire mitochondrial DNA control region in a human isolate from the Pas Valley (northern Spain). *J. Forensic Sci.* **55**, 1196-1201 (2010).
- 134 Achilli, A. *et al.* Mitochondrial DNA variation of modern Tuscans supports the near eastern origin of Etruscans. *Am. J. Hum. Genet.* **80**, 759-768 (2007).
- 135 Irwin, J. *et al.* Mitochondrial control region sequences from northern Greece and Greek Cypriots. *Int. J. Legal Med.* **122**, 87-89, (2008).
- 136 Di Benedetto, G. *et al.* Mitochondrial DNA sequences in prehistoric human remains from the Alps. *Eur. J. Hum. Genet.* **8**, 669-677 (2000).
- 137 Bogacsi-Szabo, E. *et al.* Mitochondrial DNA of ancient Cumanians: culturally Asian steppe nomadic immigrants with substantially more western Eurasian mitochondrial DNA lineages. *Hum. Biol.*, 639-662 (2005).
- 138 Helgason, A. *et al.* mtDNA and the islands of the North Atlantic: estimating the proportions of Norse and Gaelic ancestry. *Am. J. Hum. Genet.* **68**, 723-737 (2001).
- 139 Malyarchuk, B. *et al.* Mitochondrial DNA variability in Poles and Russians. *Ann. Hum. Genet.* **66**, 261-283 (2002).
